# Supplementary material
Source: PubMed Central journal article supplement (PMC3320052)

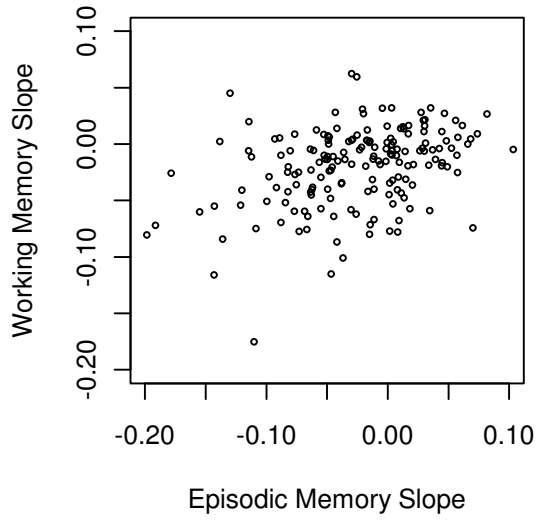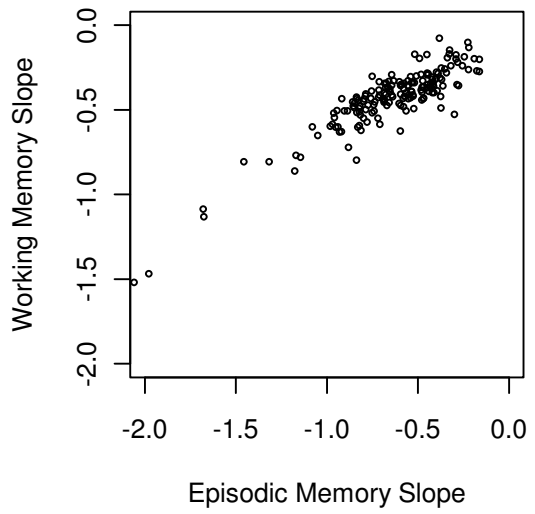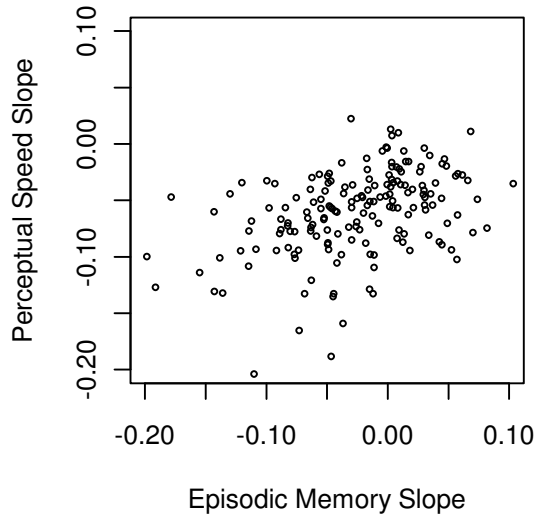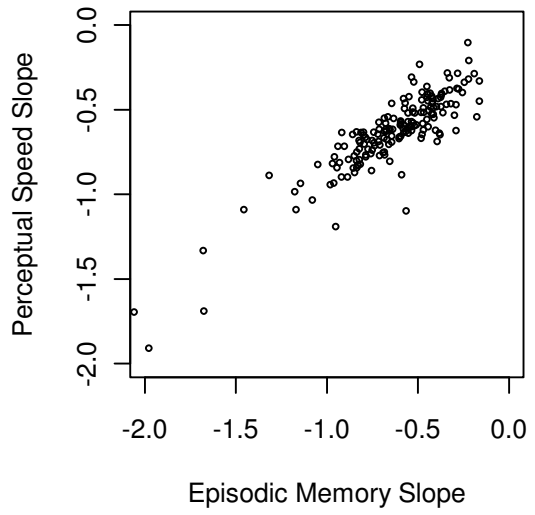

Supplement: supp_WNL.0b013e31824f7ff2_WNL203598-Figure_e-1___8.31.11.pdf [file supp_WNL.0b013e31824f7ff2_WNL203598-Figure_e-1___8.31.11.pdf]

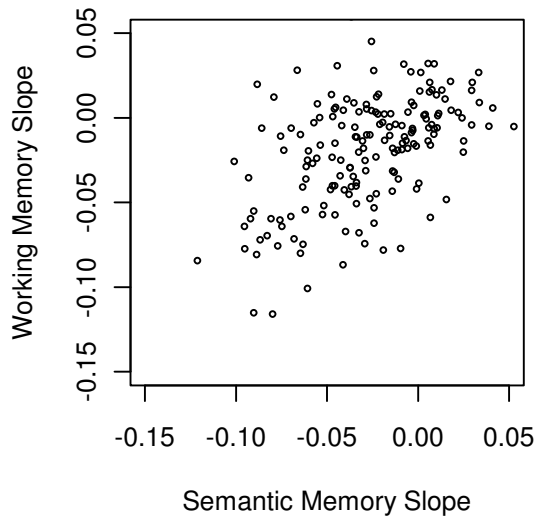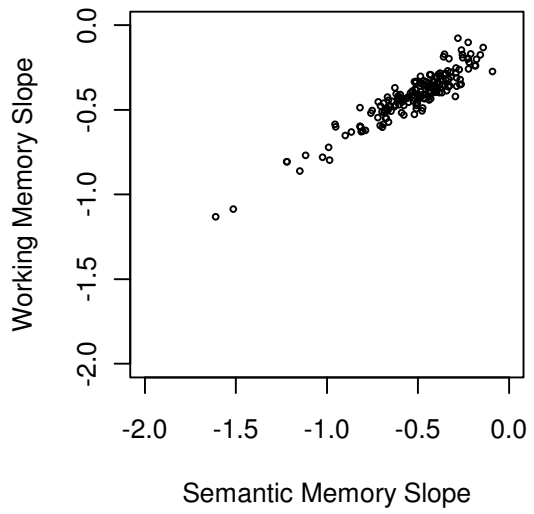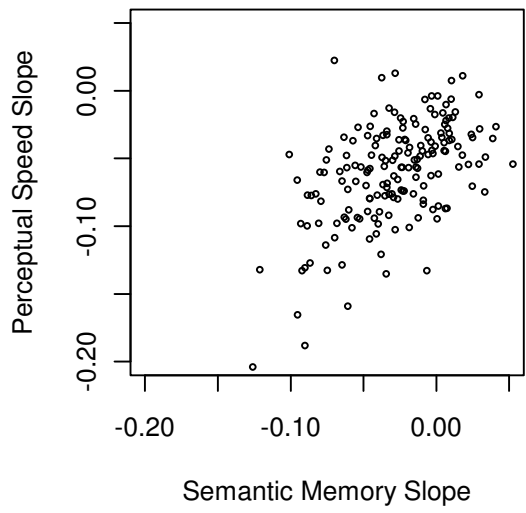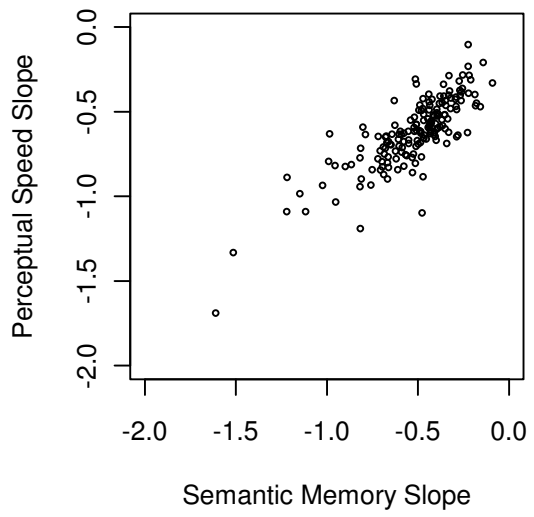

Supplement: supp_WNL.0b013e31824f7ff2_WNL203598-Figure_e-2__8.31.11.pdf [file supp_WNL.0b013e31824f7ff2_WNL203598-Figure_e-2__8.31.11.pdf]
